# Supplementary material for: A novel morphological model for carbon nanotube/polymer composites having high thermal conductivity and electrical insulation
Source: Royal Society of Chemistry journal article supplement (doi:10.1039/c0jm04007j), 2011-01-01
Supplement: c0jm04007j.pdf [file c0jm04007j.pdf]

## Supplementary Information

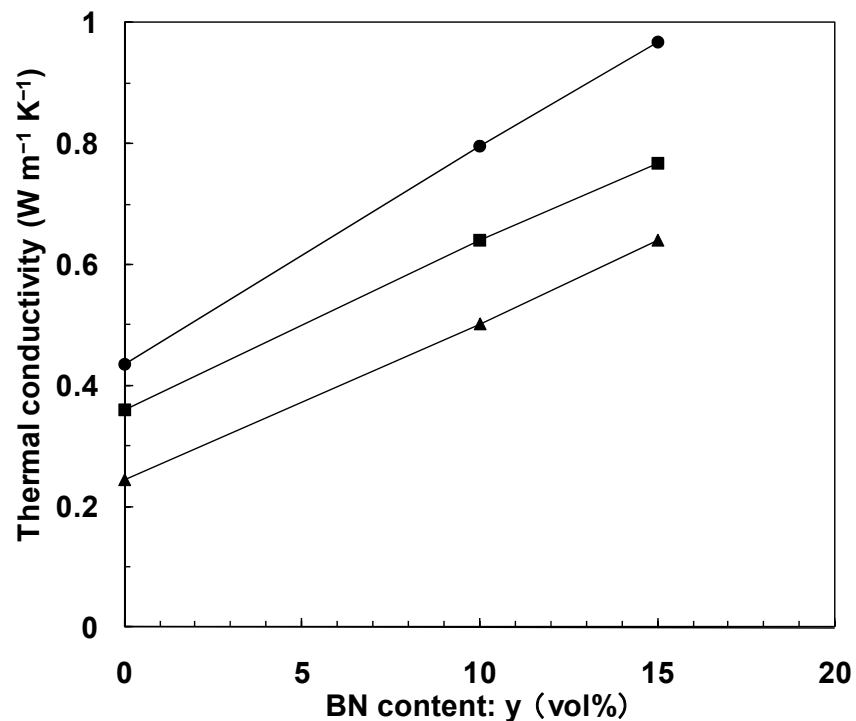

**Supplementary Fig. 1** Thermal conductivity of PPS/BN ((100-y) %/y vol%) composites (▲), MWCNT/PPS/BN ((100-y)×0.01 vol%/(100-y)×0.99 vol%/y vol%) composites (■) and MWCNT/PPS/PE/EGMA/BN ((100-y)×0.01 vol%/(100-y)×0.71 vol%/(100-y)×0.21 vol%/(100-y)×0.07 vol%/y vol%) composites (●).
